# Supplementary material
Source: publisher site journal article supplement (https://www.dovepress.com/get_supplementary_file.php?f=supplementary_file_3_51969.pdf)
Supplement: Supplementary file 1 [file get_supplementary_file.php]

**Table S3. Lists the predicted targets among a large number of target genes**

|    | p-value   | Fold-change | UniqueID       | target genes                                                                                                             |
|----|-----------|-------------|----------------|--------------------------------------------------------------------------------------------------------------------------|
| 1  | 0.0013755 | 105.5973394 | hsa-miR-141    | ACVR2B OAS2 VEZATIN                                                                                                      |
| 2  | 0.001418  | 70.01919698 | hsa-miR-106a   | TP53 HMGA2 KIAA0140 KIAA1196 KYNU                                                                                        |
| 3  | 0.0034795 | 21.09042579 | hsa-miR-200c   | HMGA2 LYPLA2 LIN28B HRG22                                                                                                |
| 4  | 4.40E-05  | 19.34663909 | hsa-miR-96     | PAPSS2 ARID3B LYPLA2                                                                                                     |
| 5  | 0.0002087 | 14.42281388 | hsa-miR-378    | OAS2 TP53 PAPSS2 KIAA0140 EMG1 LYPLA2 IQSEC2 KIAA1196 C14orf28 HRG22                                                     |
| 6  | 0.006384  | 8.015188465 | hsa-miR-604    | TP53 PAPSS2 KIAA0140 RNF44 IQSEC2 KIAA1196 CTF D8 HRG22                                                                  |
| 7  | 0.0003038 | 7.806894621 | hsa-miR-183    | LYPLA2 IQSEC2 DLL1 D8                                                                                                    |
| 8  | 0.0004779 | 5.516431715 | hsa-miR-107    | ACVR2B OAS2 KIAA0140 LYPLA2 RNF44 DLL1 VEZATIN KIAA1196 TMPRSS3                                                          |
| 9  | 0.0005951 | 4.955597325 | hsa-miR-182*   |                                                                                                                          |
| 10 | 0.0004927 | 4.826474722 | hsa-miR-182    | OAS2 VEZATIN HRG22                                                                                                       |
| 11 | 3.70E-06  | 0.015905031 | hsa-miR-299-5p | FAR1 RFX5 NAV3 PPP2R5A ENSG00000206323 CALU GOLGA1 SIAH1 ZDHC5 DST SP1 TARDBP FAM3B GNPTG                                |
| 12 | 0.0005116 | 0.015549239 | hsa-miR-134    | TP53 IQSEC2 KIAA1196 HRG22                                                                                               |
| 13 | 1.00E-07  | 0.014620055 | hsa-miR-370    | ACVR2B OAS2 HMGA2 PAPSS2 KIAA0140 ARID3B LYPLA2 RNF44 IQSEC2 DLL1 KIAA1196 TMPRSS3 LIN28B D8 HRG22                       |
| 14 | 0.00304   | 0.01457168  | hsa-miR-487b   | GLCCI1 SNAP91 MYST4 AGA PCF11 RBM34 ZMYND8 EFHD2 C4ORF32 LY6G5B,CSNK2B CLIP1 DIABLO PAK7 ALDH1A3 16ORF68                 |
| 15 | 4.03E-05  | 0.014021525 | hsa-miR-379    | ACVR2B VEZATIN C14orf28 LIN28B                                                                                           |
| 16 | 2.40E-06  | 0.013965383 | hsa-miR-655    | INO80D RBMY2FP POU2F1 ZNF521 CPEB3 TBC1D3I,TBC1D3G CUGBP2 ADAMTS6 GPR162 CD47 C8ORF37 RBM26 SAMD12 DRGX C11ORF58         |
| 17 | 0.0004876 | 0.013661893 | hsa-miR-409-3p | ACVR2B                                                                                                                   |
| 18 | 6.17E-05  | 0.013622244 | hsa-miR-494    | ZNF207 RBM4B C5ORF32 NOVA1 ARHGAP5 LIF ENSG00000196908 C9ORF122 ZC3H7A ENSG00000204914 CXXC4 ENSG00000204917 SOCS6 MACC1 |
| 19 | 1.67E-05  | 0.012826702 | hsa-miR-432    | CALB2 OAS2 HMGA2 KYNU RNF44 IQSEC2 DLL1 VEZATIN KIAA1196 TMPRSS3 C14orf28 HRG22                                          |
| 20 | 0.0001018 | 0.008957157 | hsa-miR-411    |                                                                                                                          |
